# Supplementary material
Source: Frontiers journal article supplement (https://www.frontiersin.org/articles/1604073)
Supplement: Data_Sheet_1.docx [file Data_Sheet_1.docx]

Raw Data:

Soil microorganism,data sharing on Jianguoyun:

https://www.jianguoyun.com/p/DRwrBP4Qz7iuDRiO9v0FIAA
