# Supplementary material
Source: Frontiers journal article supplement (https://www.frontiersin.org/articles/1604073)
Supplement: Data_Sheet_2.xlsx [file Data_Sheet_2.xlsx]

## Sheet: Sheet1
				Table 1				Table 2				Table 3								Table 4
Year	Rotations	Treatment	repeat	Fruit longitude/(cm)	Fruit width/(mm)	Sing fruit weight/(g)	Individual yield/(g·plant-1)	Stem/(g·plant-1)	Leaf/(g·plant-1)	Fruit/(g·plant-1)	Total/(g·plant-1)	pH	Alkeline-N(mg·kg-1)	Organic matter(g·kg-1)	Available P(mg·kg-1)	Avail K(mg·kg-1)	Total nitrogen(g·kg-1)		Year	Rotations	Treatment	repeat	Bacteria/(×106 cfu·g-1)	Fungi/(×104 cfu·g-1)	Actinomycete/(×105 cfu·g-1)							Fig. 1
2021	Winter-spring stubble	CK	1	15.67	11.82	7.52	111.98	14.61	14.61	22.52	51.74	6.37	77	12.3185	10.3173	139.85	0.33		2022	Autumn-winter stubble	CK	1	2.4	4				Year	Rotations	Treatment	repeat	SOD activity (U/g FW)	POD activity (U/g FW	CAT activity (U/g FW
			2	15.6	11.68	7.4	100.19	12.23	14.22	13.49	39.94	6.13	70	9.01598	8.15916	127.354	0.229706					2	2.4	4.1				2022	Autumn-winter stubble	CK	1	16.9139	237.8	43.8826
			3	15.92	12.3	7.01	106.93	15.18	10.38	20.11	45.67	6.27	70	9.09379	10.8708	138.793	0.42					3	2.4	4							2	24.8688	236	37.704
		B	1	16.26	11.87	8.34	108.38	15.13	11.24	28.92	55.29	6.46	75.342	24.8022	6.92251	208.052	0.526414					4	2.3	4							3	20.4756	222.6	44.5632
			2	16.06	12.26	8.02	128.88	16.08	15.19	21.64	52.91	6.11	70.852	19.9585	13.9336	228.19	0.54593					5	2.3	4						B	1	23.3433	247.2	55.7099
			3	16.02	11.04	8.07	119.28	18.42	16.31	25.88	60.61	6.54	77.306	25.6215	24.0443	220.763	0.54					6	2.3	4.1							2	24.0794	249.2	57.8918
		S	1	15.77	12.42	8.98	134.01	16.45	16.27	32.39	66.55	6.91	88.1994	18.2233	10.9152	248.542	0.618846					7	2.4	4.2							3	34.5506	269	49.1795
			2	17.22	11.34	7.68	148.55	14.89	15.43	31.59	63.47	6.93	98	19.0143	8.69373	257.152	0.938471					8	2.6	4.1						S	1	20.6054	258	69.0417
			3	16.5	11.45	8.76	120.1	17.89	18.64	39.45	72.98	6.97	98	13.7338	13.6384	228.323	0.87					9	2.2	4.1							2	17.2575	240.8	50.9261
		BS	1	17.02	12.63	8.75	174.59	15.22	16.15	36.82	72.04	7.08	91	26.7344	17.2546	297.154	0.92					10	2.3	4.1							3	28.6989	236	60.627
			2	17.9	11.48	8.97	194.5	17.15	17.79	45.94	80.88	7.13	88.1994	32.2269	13.048	307.542	1.17				B	1	4.4	5.6						BS	1	34.3173	263.8	56.0241
			3	16.68	11.31	8.94	150.04	19.07	19.38	44.34	78.94	7.33	80.8494	31.7668	19.2472	322.35	1.05					2	4.5	5.6							2	29.5462	275.4	61.9663
	Autumn-winter stubble	CK	1	16.4909	11.7491	8.499	123.62	18.41	16.9	37.79	58.54	5.42	81.8	16.7476	24.1919	89.54	0.350406					3	4.4	5.7							3	33.6476	272.4	54.8907
			2	15.9	11.9584	8.00833	93.04	17.63	16.2	23.23	71.62	5.41	74.8	14.3074	23.2325	95.15	0.480085					4	4.4	5.8
			3	15.9091	11.3645	8.06627	118.242	21.8	17.054	29.73	68.584	5.54	89.92	17.2335	24.9299	100.24	0.45					5	4.4	5.3
		B	1	15.95	11.7652	8.13909	154.07	21.17	19.32	39.96	67.55	6.03	91	26.5065	34.0812	117.254	0.600075					6	4.4	5.6
			2	16.3818	12.2326	7.91543	147.6	26.06	16.65	33.62	76.33	6.06	87.5	24.4224	29.8007	127.845	0.576755					7	4.4	5.6
			3	16.0582	12.576	8.97205	138.148	23.791	19.722	27.06	83.473	6.05	87.5	26.4643	37.1808	130.338	0.59					8	4.4	5.8
		S	1	17.1926	13.3027	8.07545	158.664	24.54	18.0835	66.99	109.614	6.09	129.5	25.4427	29.0627	174.545	0.895532					9	4.4	5.6
			2	17.075	13.6875	9.29231	168.543	24.5	19.6	60.41	104.51	6.03	126	24.4539	32.31	187.84	1.03812					10	4.4	5.6
			3	18.1788	13.5936	7.95392	170.599	26.0825	20.939	53.85	100.915	6.22	143.5	24.7168	34.9668	205.371	0.97				S	1	10	38
		BS	1	18.0607	13.5584	9.92471	167.02	22.7	20.87	80.85	134	6.31	122	44.982	42.4499	200.41	1.0777					2	11	37
			2	17.8412	13.1963	9.408	186.9	25.12	21.44	90.43	127.31	6.26	130	45.3505	38.7746	225.85	1.13155					3	10	56
			3	17.4981	14.1928	9.49164	191	27.662	20.904	90.73	139.296	6.18	115.5	37.4729	34.7	241.758	1.12					4	11	40
2022	Winter-spring stubble	CK	1	16.2679	12.9823	8.53791	300.61	37.89	27.08	56.21	121.18	5.41	87.5452	11.6	27.52	67.52	0.476637					5	10	42
			2	16.6488	13.2148	8.12459	367.13	34.7	24.1	44.42	103.22	5.45	84.851	13.17	24.87	60.51	0.447261					6	10	32
			3	15.4312	12.2582	8.67807	267.747	39.649	28.995	33.62	102.264	5.35	80.524	16	23.18	73.85	0.57					7	11	32
		B	1	16.6156	13.3632	8.84821	360.61	35.27	27.82	54.55	117.64	6.08	110.5	18.09	23.28	78.28	0.543478					8	11	34
			2	17.3054	13.6322	8.14231	326.47	36.25	28.62	47.36	112.23	6.2	118.5	19.38	27.83	70.85	0.583987					9	11	38
			3	16.6193	13.0312	9.34164	283.582	35.391	29.05	40.44	104.881	6.19	103.25	24.25	29.62	74.254	0.82					10	11	50
		S	1	17.7373	15.0309	10.7945	604.99	59.6	35.06	56.75	152.41	5.96	147.281	27.52	31.93	107.845	0.842983				BS	1	13	56
			2	16.923	13.1632	9.78343	684.84	54.23	31.09	76.14	160.46	5.83	143.582	28.88	22.28	106.154	1.07819					2	14	57
			3	16.4044	15.0296	10.1967	690.644	52.274	31.674	66.81	150.758	5.98	136.525	18.44	23.66	105.85	1.29					3	12	62
		BS	1	17.4294	15.4085	10.8694	706.08	56.6	36.22	90.46	183.28	6.42	140.252	41.99	26.99	130.254	1.24346					4	13	25
			2	17.9653	15.0787	10.4064	765.02	59.55	35.15	106.04	200.74	6.26	129.585	52.52	41.93	133.185	1.36959					5	13	26
			3	17.0033	14.9324	11.6636	668.71	58.252	40.869	85.34	184.461	6.41	133.252	45.97	31.2	133.5	1.56					6	12	24
	Autumn-winter stubble	CK	1	11	14.0025	8.73667	56.06	13.35	14.06	27.41	54.82	4.97	126.93	4.01402	24.5402	37.25	0.569848					7	12	61
			2	11.65	13.8063	8.00857	43.19	14.3	15.18	22.85	52.33	5.1	120.63	10.5042	26.7039	53.821	0.61871					8	12	27
			3	11.5824	15.5225	9.37528	49.514	15.26	13.59	33.09	61.94	5.04	134.43	7.07491	26.5236	38.1254	0.644279					9	11	34
		B	1	12.6667	14.9395	9.36077	92.87	11.6	15.08	21.68	48.36	5.32	133.1	24.707	24.1796	50.3254	0.793078					10	12	54
			2	11.9	15.303	10.044	86.65	12.3	14.97	27.32	54.59	5.38	126.6	12.179	31.1516	53.2845	1.02376
			3	12.6614	15.135	9.5956	73.641	11.6067	13.3867	30.44	55.4333	5.56	129.3	15.2357	40.107	68.554	1.14842
		S	1	12.6167	16.3335	10.0821	194.837	20.89	18.02	46.63	77.28	5.93	164.5	25.5332	29.5889	80.2452	1.31389
			2	12.7158	17.4142	11.2129	185.64	19.49	19.39	38.37	85.51	5.98	157.5	32.7861	46.6583	74.8245	1.32165
			3	12.1028	16.0123	10.2752	191.289	19.1433	18.8067	44.46	82.41	6.08	147	29.7832	25.2946	82.1545	1.34777
		BS	1	12.5917	17.9688	10.3663	205.42	15.42	17.2	41.55	88.64	6.21	170.7	58.6974	29.4086	93.1545	1.47821
			2	12.0211	17.7178	11.5471	195.89	17.4	18.89	53.06	89.35	6.15	171.7	44.307	37.5225	102.845	1.57525
			3	13.7111	17.1534	10.0179	228.516	17.14	17.3433	56.02	76.0333	6.14	179.1	53.315	37.4853	113.534	1.62673
